# Supplementary material for: Intercropped Maize and Cowpea Increased the Land Equivalent Ratio and Enhanced Crop Access to More Nitrogen and Phosphorus Compared to Cultivation as Sole Crops
Source: MDPI journal article supplement (doi:10.3390/su16041440), 2024-02-08
Supplement: s1 [file s1]

## **Supplementary tables S1 and S2**

### **Intercropped Maize and Cowpea Increased the Land Equivalent Ratio and Enhanced Crop Access to More Nitrogen and Phosphorus Compared to Cultivation as Sole Crops**

**Paulo Dimande<sup>1,2,3</sup>, Margarida Arrobas<sup>3,4</sup> and Manuel Ângelo Rodrigues<sup>3,4,\*</sup>**

<sup>1</sup> Escola Superior de Desenvolvimento Rural, Universidade Eduardo Mondlane, Bairro 5º Congresso, Vilankulos 1304, Mozambique; pjdimande@gmail.com

<sup>2</sup> Universidade de Trás-os-Montes e Alto Douro, Quinta de Prados, 5000-801 Vila Real, Portugal

<sup>3</sup> Centro de Investigação de Montanha (CIMO), Instituto Politécnico de Bragança, Campus de Santa Apolónia, 5300-253 Bragança, Portugal; marrobas@ipb.pt

<sup>4</sup> Laboratório para a Sustentabilidade e Tecnologia em Regiões de Montanha, Instituto Politécnico de Bragança, Campus de Santa Apolónia, 5300-253 Bragança, Portugal

\* Correspondence: angelor@ipb.pt

Table S1. Nutrient concentration in aboveground cabbage tissues when the species was grown after sole maize (M), cowpea (C), and the intercropping of maize and cowpea (M+C).

| Treatment      | Phosphorus         | Potassium | Calcium | Magnesium | Boron               | Iron     | Manganese | Zinc    | Copper |  |
|----------------|--------------------|-----------|---------|-----------|---------------------|----------|-----------|---------|--------|--|
|                | g kg <sup>-1</sup> |           |         |           | mg kg <sup>-1</sup> |          |           |         |        |  |
| 2018           |                    |           |         |           |                     |          |           |         |        |  |
| M              | 1.1 a              | 15.8 a    | 12.8 a  | 4.8 a     | 25.4 a              | 114.1 a  | 81.4 a    | 24.4 a  | 8.2 a  |  |
| C              | 1.2 a              | 16.9 a    | 11.0 a  | 5.0 a     | 22.0 a              | 107.3 a  | 50.1 b    | 28.2 a  | 8.3 a  |  |
| M+C            | 1.5 a              | 18.0 a    | 9.7 a   | 4.0 a     | 26.5 a              | 87.3 a   | 53.7 b    | 19.9 a  | 9.3 a  |  |
| Probability    | 0.0700             | 0.4681    | 0.1572  | 0.1248    | 0.3082              | 0.0517   | 0.0018    | 0.0767  | 0.6231 |  |
| Standard error | 0.10               | 1.16      | 0.98    | 0.29      | 1.95                | 6.02     | 3.67      | 2.05    | 0.84   |  |
| 2019           |                    |           |         |           |                     |          |           |         |        |  |
| M              | 1.0 a              | 19.0 a    | 13.8 a  | 3.8 a     | 33.6 a              | 316.9 a  | 99.7 a    | 34.4 a  | 4.8 a  |  |
| C              | 1.1 a              | 19.5 a    | 14.2 a  | 4.1 a     | 39.6 a              | 166.4 b  | 98.5 a    | 33.4 ab | 3.8 a  |  |
| M+C            | 1.0 a              | 15.6 a    | 14.4 a  | 3.6 a     | 35.6 a              | 205.2 ab | 84.6 a    | 25.6 b  | 4.7 a  |  |
| Probability    | 0.5269             | 0.2105    | 0.8943  | 0.7324    | 0.3067              | 0.0370   | 0.2090    | 0.0353  | 0.4181 |  |
| Standard error | 0.10               | 1.49      | 0.94    | 0.49      | 2.53                | 31.89    | 5.86      | 1.93    | 0.57   |  |

Within each year, and in columns, means followed by the same letter are not significant different by Tukey HSD test ( $\alpha = 0.05$ ).

Table S2. Nutrient recovery in aboveground cabbage tissues when the species was grown after sole maize (M), cowpea (C), and the intercropping of maize and cowpea (M+C).

|           |                | Phosphorus         | Potassium | Calcium | Magnesium | Boron               | Iron     | Manganese | Zinc    | Copper |
|-----------|----------------|--------------------|-----------|---------|-----------|---------------------|----------|-----------|---------|--------|
| Treatment |                | g kg <sup>-1</sup> |           |         |           | mg kg <sup>-1</sup> |          |           |         |        |
| 2018      |                |                    |           |         |           |                     |          |           |         |        |
|           | M              | 3.6 a              | 50.4 a    | 40.6 a  | 15.6 a    | 82.1 a              | 370.6 a  | 263.2 a   | 77.4 b  | 27.3 a |
|           | C              | 4.6 a              | 63.5 a    | 41.9 a  | 18.9 a    | 84.3 a              | 418.8 a  | 191.5 a   | 106.8 a | 32.8 a |
|           | M+C            | 5.3 a              | 63.7 a    | 33.4 a  | 13.9 a    | 92.8 a              | 304.5 a  | 188.4 a   | 68.8 b  | 32.8 a |
|           | Probability    | 0.4588             | 0.2615    | 0.1239  | 0.2091    | 0.7752              | 0.4306   | 0.1887    | 0.0112  | 0.7973 |
|           | Standard error | 0.90               | 5.86      | 2.65    | 1.78      | 82.1 a              | 370.6 a  | 263.2 a   | 77.4 b  | 27.3 a |
| 2019      |                |                    |           |         |           |                     |          |           |         |        |
|           | M              | 3.6 a              | 65.0 a    | 47.2 b  | 13.3 a    | 113.6 b             | 1059.2 a | 338.2 b   | 116.7 a | 16.4 a |
|           | C              | 6.1 a              | 105.2 a   | 75.9 a  | 22.1 a    | 215.3 a             | 897.9 a  | 533.4 a   | 182.9 a | 20.8 a |
|           | M+C            | 4.8 a              | 79.7 a    | 72.8 ab | 18.1 a    | 180.0 ab            | 1038.8 a | 423.4 ab  | 128.8 a | 23.9 a |
|           | Probability    | 0.0543             | 0.1474    | 0.0357  | 0.1727    | 0.0355              | 0.6317   | 0.0388    | 0.0854  | 0.4264 |
|           | Standard error | 0.57               | 12.44     | 6.38    | 2.83      | 20.86               | 124.62   | 40.43     | 18.04   | 3.81   |

Within each year, and in columns, means followed by the same letter are not significant different by Tukey HSD test ( $\alpha = 0.05$ ).
